# Supplementary material
Source: publisher figshare collection journal article supplement (https://sage.figshare.com/ndownloader/files/20080019)
Supplement: Supplementary file 1 [file 20080019]

## Appendix 1: eHealth Connections under the AKDN eHealth Programme 2013-2017

| eHealth Connections |                                                          |                 |                                                 |                 |
|---------------------|----------------------------------------------------------|-----------------|-------------------------------------------------|-----------------|
| #                   | Hub Site                                                 | Country         | Spoke Site                                      | Country         |
| 1                   | French Medical Institute for Children                    | Afghanistan     | Mirwais Regional Hospital                       | Afghanistan     |
| 2                   | Faizabad Provincial Hospital                             | Afghanistan     | Kisham District Hospital                        | Afghanistan     |
| 3                   | Faizabad Provincial Hospital                             | Afghanistan     | Baharak District Hospital                       | Afghanistan     |
| 4                   | Faizabad Provincial Hospital                             | Afghanistan     | Bashore Community Health Centre (CHC)           | Afghanistan     |
| 5                   | Faizabad Provincial Hospital                             | Afghanistan     | Ishkashim CHC                                   | Afghanistan     |
| 6                   | Faizabad Provincial Hospital                             | Afghanistan     | Nusai CHC                                       | Afghanistan     |
| 7                   | La Chaîne de l'Espoir                                    | France          | French Medical Institute for Children           | Afghanistan     |
| 8                   | National Centre for Maternal and Childhood Care, Bishkek | Kyrgyz Republic | Naryn Oblast Family Medicine Centre             | Kyrgyz Republic |
| 9                   | National Centre for Maternal and Childhood Care, Bishkek | Kyrgyz Republic | Naryn Oblast Merged Hospital                    | Kyrgyz Republic |
| 10                  | National Surgery Centre, Bishkek                         | Kyrgyz Republic | Naryn Oblast Merged Hospital-Surgery Department | Kyrgyz Republic |
| 11                  | National Cardiology Centre, Bishkek                      | Kyrgyz Republic | Naryn Oblast Merged Hospital                    | Kyrgyz Republic |
| 12                  | Republican Centre of Infectious Diseases                 | Kyrgyz Republic | Naryn Oblast Merged Hospital                    | Kyrgyz Republic |
| 13                  | Geneva University Hospitals                              | Kyrgyz Republic | Naryn Oblast Merged Hospital                    | Kyrgyz Republic |
| 14                  | National Cardiology Centre, Bishkek                      | Kyrgyz Republic | Naryn Oblast Merged Hospital                    | Kyrgyz Republic |
| 15                  | Kyrgyz State Medical Institute of Continuous Education   | Kyrgyz Republic | Naryn Oblast Family Medicine Centre             | Kyrgyz Republic |
| 16                  | Kyrgyz State Medical Academy                             | Kyrgyz Republic | Naryn Oblast Family Medicine Centre             | Kyrgyz Republic |
| 17                  | National Surgery Centre, Bishkek                         | Kyrgyz Republic | At-Bashy Territorial Hospital                   | Kyrgyz Republic |
| 18                  | Republican Centre of Infectious Diseases                 | Kyrgyz Republic | At-Bashy Territorial Hospital                   | Kyrgyz Republic |
| 19                  | National Centre for Maternal and Childhood Care, Bishkek | Kyrgyz Republic | At-Bashy Territorial Hospital                   | Kyrgyz Republic |
| 20                  | Geneva University Hospitals                              | Kyrgyz Republic | At-Bashy Territorial Hospital                   | Kyrgyz Republic |
| 21                  | Aga Khan University Hospital                             | Pakistan        | Comprehensive Health Centre, Aliabad            | Pakistan        |
| 22                  | Aga Khan University Hospital                             | Pakistan        | Aga Khan Medical Centre, Booni                  | Pakistan        |
| 23                  | Aga Khan University Hospital                             | Pakistan        | Aga Khan Medical Centre, Gilgit                 | Pakistan        |
| 24                  | Aga Khan University Hospital                             | Pakistan        | Singal Medical Centre                           | Pakistan        |
| 25                  | Aga Khan University                                      | Pakistan        | Soust Health Centre                             | Pakistan        |
| 26                  | Aga Khan University                                      | Pakistan        | Aga Khan Family Health Centre, Chatorkhand      | Pakistan        |
| 27                  | Aga Khan Medical Centre, Gilgit                          | Pakistan        | Aga Khan Medical Centre, Booni                  | Pakistan        |
| 28                  | Aga Khan Medical Centre, Gilgit                          | Pakistan        | Aga Khan Family Health Centre, Chatorkhand      | Pakistan        |

|    |                                      |            |                                            |             |
|----|--------------------------------------|------------|--------------------------------------------|-------------|
| 29 | Aga Khan Medical Centre, Gilgit      | Pakistan   | Garamchashma Tehsil Hospital               | Pakistan    |
| 30 | Aga Khan Medical Centre, Gilgit      | Pakistan   | Soust Health Centre                        | Pakistan    |
| 31 | Singal Health Centre                 | Pakistan   | Aga Khan Family Health Centre, Chatorkhand | Pakistan    |
| 32 | Khorog Oblast General Hospital*      | Tajikistan | Bashore CHC                                | Afghanistan |
| 33 | Khorog Oblast General Hospital*      | Tajikistan | Ishkashim CHC                              | Afghanistan |
| 34 | Khorog Oblast General Hospital*      | Tajikistan | Nusai CHC                                  | Afghanistan |
| 35 | Post-Graduate Medical Institute      | Tajikistan | Khorog Oblast General Hospital             | Tajikistan  |
| 36 | Dushabe Medical & Diagnostic Centre  | Tajikistan | Khorog Oblast General Hospital             | Tajikistan  |
| 37 | Dushanbe Medical & Diagnostic Centre | Tajikistan | Darwaz District Hospital                   | Tajikistan  |
| 38 | Dushanbe Medical & Diagnostic Centre | Tajikistan | Ishkashim District Hospital                | Tajikistan  |
| 39 | Dushanbe Medical & Diagnostic Centre | Tajikistan | Roshan District Hospital                   | Tajikistan  |
| 40 | Post-Graduate Medical Institute      | Tajikistan | Darwaz District Hospital                   | Tajikistan  |
| 41 | Post-Graduate Medical Institute      | Tajikistan | Ishkashim District Hospital                | Tajikistan  |
| 42 | Post-Graduate Medical Institute      | Tajikistan | Roshan District Hospital                   | Tajikistan  |
| 43 | Aga Khan Health Board                | USA        | Khorog Oblast General Hospital             | Tajikistan  |
| 44 | National Medical Centre, Karabolo    | Tajikistan | Khorog Oblast General Hospital             | Tajikistan  |
| 45 | Khorog Oblast General Hospital       | Tajikistan | Ishkashim District Hospital                | Tajikistan  |
| 46 | Khorog Oblast General Hospital       | Tajikistan | Roshan District Hospital                   | Tajikistan  |
| 47 | Khorog Oblast General Hospital       | Tajikistan | Darwaz District Hospital                   | Tajikistan  |

## Appendix 2: Medical specialties offered in the eHealth Programme in South-Central Asia

| Specialties             | Afghanistan | Pakistan | Tajikistan | Kyrgyz Republic |
|-------------------------|-------------|----------|------------|-----------------|
| Cardiology              | x           |          | x          | x               |
| Dermatology             | x           | x        | x          |                 |
| ENT                     | x           |          | x          |                 |
| Family medicine         |             | x        |            | x               |
| Infectious Diseases     |             |          | x          |                 |
| Internal medicine       | x           |          | x          |                 |
| Neurology               | x           |          | x          |                 |
| Obstetrics & gynecology | x           |          | x          |                 |
| Ophthalmology           | x           |          |            |                 |
| Orthopedics             | x           |          |            |                 |
| Pathology               | x           |          |            |                 |
| Pain management         | x           |          |            |                 |
| Pediatric medicine      | x           |          | x          | x               |
| Pediatric neurology     | x           |          |            |                 |
| Psychiatry              | x           | x        |            |                 |
| Radiology               | x           |          | x          |                 |
| Surgery                 | x           |          | x          | x               |
| Stomatology             | x           |          |            |                 |
| Traumatology            |             |          | x          |                 |
| Urology                 | x           |          |            |                 |
